# Supplementary material for: Effect of high-copper diet on transference of blaCTX−M genes among Escherichia coli strains in rats' intestine
Source: Front Vet Sci. 2023 Mar 9;10:1127816. doi: 10.3389/fvets.2023.1127816 (PMC10033962; doi:10.3389/fvets.2023.1127816)
Supplement: Supplementary file 1 [file Table_1.DOCX]

Supplementary Material

Effect of dietary high copper on transference of blaCTX-M genes among Escherichia coil strains in rats’ intestine

Kang Liu, Linqian Li, Mengwei Weng, Feng Zhang, Rong Guo, Jinhu Huang, Wen Yao*

*** Correspondence:** **Wen Yao**: [yaowen67jp@njau.edu.cn](mailto:yaowen67jp@njau.edu.cn)

Supplementary table: Changes of copper levels in rat fecal samples (mg/kg).

| Group | Sample days | | | SEM | *P*-value |
| --- | --- | --- | --- | --- | --- |
| D1 | D27 | D57 |
| C-（6 mg/kg） | 125.87 | 113.94a | 110.89a | 7.93 | 0.73 |
| C+（6 mg/kg） | 104.74 | 136.88a | 112.99a | 16.28 | 0.72 |
| H-（240 mg/kg） | 91.27X | 4109.58bY | 4215.76bY | 421.74 | ＜0.01 |
| H+（240 mg/kg） | 61.44X | 3968.78bY | 3855.33bY | 388.22 | 0.01 |
| SEM | 13.06 | 373.84 | 364.62 |  |  |
| *P*-value | 0.08 | ＜0.01 | ＜0.01 |  |  |

Values in a column with different lowercase superscripts are significantly different (*P*＜0.05), in a row with different capital superscripts are significantly different（*P*＜0.05）.
